# Supplementary material
Source: MDPI journal article supplement (https://www.mdpi.com/2079-9284/9/5/90)
Supplement: s1 [file s1]

# A state-of-the-art review on the alternatives to animal testing for the safety assessment of cosmetics

## Supplementary material

**Table S1.** Glossary of abbreviations.

|                   |                                                                                                     |
|-------------------|-----------------------------------------------------------------------------------------------------|
| <b>3Rs</b>        | Replacement, Reduction, and Refinement                                                              |
| <b>ADME</b>       | Absorption, Distribution, Metabolism, and Excretion                                                 |
| <b>AMNH</b>       | American Museum of Natural History                                                                  |
| <b>AOP</b>        | Adverse Outcome Pathway                                                                             |
| <b>BCOP</b>       | Bovine Cornea Opacity Permeability                                                                  |
| <b>CEA</b>        | Cost-Effectiveness Analysis                                                                         |
| <b>CFDA</b>       | Chinese State Food and Drug Administration                                                          |
| <b>CTA</b>        | Cell Transformation Assay                                                                           |
| <b>CTFA</b>       | Cosmetic, Toiletry and Fragrance Association                                                        |
| <b>DAs</b>        | Defined Approaches                                                                                  |
| <b>DPRA</b>       | Direct Peptide Reactivity Assay                                                                     |
| <b>EC</b>         | European Commission                                                                                 |
| <b>EC JRC</b>     | European Commission's Joint Research Centre                                                         |
| <b>ECHA</b>       | European Chemicals Agency                                                                           |
| <b>EFTA</b>       | European Free Trade Association                                                                     |
| <b>EPA</b>        | U.S. Environmental Protection Agency                                                                |
| <b>EU</b>         | European Union                                                                                      |
| <b>EURION</b>     | European Cluster to Improve Identification of Endocrine Disruptors                                  |
| <b>EURL ECVAM</b> | European Centre for the Validation of Alternative Methods                                           |
| <b>FDA</b>        | Food and Drug Administration                                                                        |
| <b>FDP</b>        | Fixed-Dose Procedure Test                                                                           |
| <b>FRAME</b>      | Fund for the Replacement of Animals in Medical Experiments                                          |
| <b>GMP</b>        | Good Manufacturing Practices                                                                        |
| <b>GTxC</b>       | Genotoxic Carcinogens                                                                               |
| <b>h-CLAT</b>     | Human Cell Line Activation Test                                                                     |
| <b>HTS</b>        | High-Throughput Screening                                                                           |
| <b>IATA</b>       | Integrated Approach for Testing and Assessment                                                      |
| <b>ICATM</b>      | International Cooperation on Alternative Test Methods                                               |
| <b>ICCVAM</b>     | Interagency Coordinating Committee on the Validation of Alternative Methods                         |
| <b>ICE</b>        | Isolated Chicken Eye                                                                                |
| <b>ICH</b>        | International Council for Harmonisation of Technical Requirements for Pharmaceuticals for Human Use |
| <b>ITS</b>        | Integrated Testing Strategy                                                                         |
| <b>JaCVAM</b>     | Japanese Centre for the Validation of Alternative Methods                                           |

|               |                                                                       |
|---------------|-----------------------------------------------------------------------|
| <b>LD50</b>   | Median Lethal Dose                                                    |
| <b>LOAEL</b>  | Lowest Observed Adverse Effect Level                                  |
| <b>MNvit</b>  | in vitro Micronucleus Test                                            |
| <b>MoA</b>    | Mode-of-Action                                                        |
| <b>MoS</b>    | Margin of Safety                                                      |
| <b>NAM</b>    | New Approach Methodology                                              |
| <b>NGOs</b>   | Non-Governmental Organizations                                        |
| <b>NGRA</b>   | Next Generation Risk Assessment                                       |
| <b>NGTxC</b>  | Non-Genotoxic Carcinogens                                             |
| <b>NOAEL</b>  | No-Observed-Adverse-Effect Level                                      |
| <b>NRU</b>    | 3T3 Neutral Red Uptake test                                           |
| <b>NTP</b>    | National Toxicology Program                                           |
| <b>OECD</b>   | Organisation for Economic Co-operation and Development                |
| <b>OI</b>     | Ocular Irritation                                                     |
| <b>PBTK</b>   | Physiologically Based Toxicokinetics                                  |
| <b>PoD</b>    | Point of Departure                                                    |
| <b>(Q)SAR</b> | (Quantitative) Structure-Activity Relationship                        |
| <b>RCB</b>    | Rodent Carcinogenicity Bioassay                                       |
| <b>REACH</b>  | Registration, Evaluation, Authorisation and Restriction of Chemicals  |
| <b>RhCE</b>   | Reconstructed Human Cornea-like Epithelium                            |
| <b>RHE</b>    | Reconstructed Human Epidermis                                         |
| <b>RhT</b>    | Reconstructed Human Tissue                                            |
| <b>ROS</b>    | Reactive Oxygen Species                                               |
| <b>RSMN</b>   | Reconstructed Human Skin Micronucleus                                 |
| <b>SAR</b>    | Structure-Based Approaches                                            |
| <b>SCCS</b>   | Scientific Committee on Consumer Safety                               |
| <b>SEURAT</b> | Safety Evaluation Ultimately Replacing Animal Testing                 |
| <b>SHE</b>    | Syrian Hamster Embryo                                                 |
| <b>STE</b>    | Short Time Exposure                                                   |
| <b>STSC</b>   | Safety and Technical Standards for Cosmetics                          |
| <b>Tox21</b>  | Toxicology in the 21st Century Program                                |
| <b>TSAR</b>   | Tracking System for Alternative Methods Towards Regulatory Acceptance |
| <b>UDP</b>    | Up-and-Down Procedure                                                 |
| <b>UV-Vis</b> | Ultraviolet Radiation/Visible Light                                   |
| <b>WoE</b>    | Weight of Evidence                                                    |

**Table S2.** Examples of QSAR computer programmes for cosmetic-relevant endpoints (not a complete list of available programmes, nor a list of regulatory verified QSAR models), modified from [86].

| Toxicological Endpoint                                | Software Tool                      | Models/Modules                                                   |
|-------------------------------------------------------|------------------------------------|------------------------------------------------------------------|
| <i>Acute toxicity</i>                                 | Danish QSAR Database (DTU)         | Models for acute toxicity in rodents from ACD/Labs               |
|                                                       | T.E.S.T. (US EPA)                  | Oral rat LD50                                                    |
|                                                       | ACD/Percepta (ACD/Labs)            | Acute Toxicity Module                                            |
|                                                       | ADMET Predictor (Simulations Plus) | Toxicity module                                                  |
|                                                       | CASE Ultra (MultiCASE)             | AcuteTox model bundle                                            |
|                                                       | Discovery Studio (Accelrys)        | Rat oral LD50 and rat inhalation toxicity LC50                   |
| <i>Skin irritation or skin corrosion</i>              | Danish QSAR Database (DTU)         | Skin irritation model                                            |
|                                                       | OECD QSAR Toolbox                  | Skin irritation/corrosion Inclusion (and Exclusion) rules by BfR |
|                                                       | ToxTree (JRC)                      | Skin irritation / skin corrosion                                 |
|                                                       | ACD/Percepta (ACD/Labs)            | Irritation Module                                                |
|                                                       | CASE Ultra (MultiCASE)             | SkinEye Toxicity model bundle                                    |
|                                                       | Derek (Lhasa)                      | Irritation (of the skin) alerts                                  |
|                                                       | Discovery Studio (Accelrys)        | Skin irritancy                                                   |
| <i>Eye irritation</i>                                 | OECD QSAR Toolbox                  | Eye irritation/corrosion Inclusion (and Exclusion) rules by BfR  |
|                                                       | ToxTree (JRC)                      | Eye irritation and corrosion                                     |
|                                                       | ACD/Percepta (ACD/Labs)            | Irritation Module                                                |
|                                                       | CASE Ultra (MultiCASE)             | SkinEye Toxicity model bundle                                    |
|                                                       | Derek (Lhasa)                      | Irritation (of the eye) alerts                                   |
|                                                       | Discovery Studio (Accelrys)        | Ocular irritancy                                                 |
| <i>Skin sensitisation</i>                             | Danish QSAR Database (DTU)         | Allergic Contact Dermatitis model                                |
|                                                       | OECD QSAR Toolbox                  | Protein binding alerts for skin sensitisation by OASIS           |
|                                                       | ToxTree (JRC)                      | Skin sensitisation reactivity domains                            |
|                                                       | VEGA (IRFMN)                       | CAESAR model                                                     |
|                                                       | ACD/Percepta (ACD/Labs)            | Irritation Module                                                |
|                                                       | CASE Ultra (MultiCASE)             | SkinEye Toxicity model bundle                                    |
|                                                       | Derek (Lhasa)                      | Skin sensitisation                                               |
|                                                       | Discovery Studio (Accelrys)        | Skin sensitization                                               |
|                                                       | TIMES (LMC)                        | Skin sensitization with autooxidation                            |
| <i>Repeated dose toxicity</i>                         | ADMET Predictor (Simulations Plus) | Toxicity module                                                  |
|                                                       | CASE Ultra (MultiCASE)             | Several model bundles associated with repeated dose toxicity     |
|                                                       | Derek (Lhasa)                      | Several endpoints associated with repeated dose toxicity         |
|                                                       | Discovery Studio (Accelrys)        | Rat Chronic (Oral) LOAEL                                         |
|                                                       | Leadscope                          | Several models associated with repeated dose toxicity            |
| <i>In vitro gene mutation in bacteria (Ames test)</i> | Danish QSAR Database (DTU)         | Models for Ames test                                             |
|                                                       | OECD QSAR Toolbox                  | Several profilers (alerts) associated with this endpoint         |
|                                                       | T.E.S.T. (US EPA)                  | Mutagenicity                                                     |
|                                                       | ToxTree (JRC)                      | <i>In vitro</i> mutagenicity (Ames test) alerts by ISS           |
|                                                       | VEGA (IRFMN)                       | CAESAR, SarPy/IRFMN, ISS and                                     |
|                                                       |                                    | KNN/Read-Across models                                           |

|                                                                                   |                                    |                                                                               |
|-----------------------------------------------------------------------------------|------------------------------------|-------------------------------------------------------------------------------|
|                                                                                   | ACD/Percepta (ACD/Labs)            | Genotoxicity Module                                                           |
|                                                                                   | CASE Ultra (MultiCASE)             | Bacterial mutagenicity model bundle                                           |
|                                                                                   | Derek and Sarah (Lhasa)            | Mutagenicity <i>in vitro</i>                                                  |
|                                                                                   | Discovery Studio (Accelrys)        | Ames Mutagenicity                                                             |
|                                                                                   | Leadscope                          | Genetox Expert Alerts Suite and Non-human Genetic Toxicity Suite              |
|                                                                                   | TIMES (LMC)                        | Ames mutagenicity                                                             |
| <b>Mutagenicity<br/>(other endpoints than in vitro gene mutation in bacteria)</b> | Danish QSAR Database (DTU)         | Models for genotoxicity endpoints                                             |
|                                                                                   | OECD QSAR Toolbox                  | Several profilers (alerts) associated with mutagenicity                       |
|                                                                                   | ToxTree (JRC)                      | Several decision trees associated with mutagenicity                           |
|                                                                                   | CASE Ultra (MultiCASE)             | EcoTox model bundle                                                           |
|                                                                                   | Derek (Lhasa)                      | Chromosome damage <i>in vitro</i>                                             |
|                                                                                   | Leadscope                          | Non-human Genetic Toxicity Suite                                              |
|                                                                                   | TIMES (LMC)                        | Several models associated with mutagenicity                                   |
| <b>Reproductive toxicity</b>                                                      | Danish QSAR Database (DTU)         | Models for Endocrine endpoints and model for Teratogenic Potential in Humans  |
|                                                                                   | VEGA (IRFMN)                       | CAESAR and PG models                                                          |
|                                                                                   | ADMET Predictor (Simulations Plus) | Toxicity module                                                               |
|                                                                                   | CASE Ultra (MultiCASE)             | Several model bundles associated with reproductive and developmental toxicity |
|                                                                                   | Derek (Lhasa)                      | Several endpoints associated with reproductive toxicity                       |
|                                                                                   | Discovery Studio (Accelrys)        | Developmental Toxicity Potential                                              |
|                                                                                   | Leadscope                          | Several models associated with reproductive and developmental toxicity        |
|                                                                                   | TIMES (LMC)                        | Androgen, AHR and Estrogen (receptor) binding affinity models                 |

**Table S3.** Acute toxicity testing waiver criteria [93].

| Toxicological Endpoint           | Waiver Criteria                                                                                                                                                                                                                                                                                                                                                                                                                                                                                                                                                                                                                                                                                                                                                                                                                                                                                                                                                                                      |
|----------------------------------|------------------------------------------------------------------------------------------------------------------------------------------------------------------------------------------------------------------------------------------------------------------------------------------------------------------------------------------------------------------------------------------------------------------------------------------------------------------------------------------------------------------------------------------------------------------------------------------------------------------------------------------------------------------------------------------------------------------------------------------------------------------------------------------------------------------------------------------------------------------------------------------------------------------------------------------------------------------------------------------------------|
| <i>Acute Oral Toxicity</i>       | <ul style="list-style-type: none"> <li>- Human exposure is limited/not significant or technically not feasible (e.g., the test substance is a gas/vapour at ambient temperature, too large to be ingested, etc.).</li> <li>- The test chemical is corrosive to the skin (GHS Category 1), based on validated/accepted <i>in vivo/in vitro</i>/other data, or if the substance has a pH ≤ 2 or ≥ 11.5 (alongside high buffering capacity).</li> <li>- The oral LD<sub>50</sub> of the substance is predicted to be &gt;2000mg/kg bw based on results of a validated/accepted NAM or test battery.</li> </ul>                                                                                                                                                                                                                                                                                                                                                                                          |
| <i>Acute Dermal Toxicity</i>     | <ul style="list-style-type: none"> <li>- The test chemical is found to be corrosive or severely irritating to the skin (GHS Category 1), based on validated/accepted <i>in vivo/in vitro</i>/other data, or if the substance has a pH ≤ 2 or ≥ 11.5 (alongside high buffering capacity).</li> <li>- Dermal exposure is unlikely due to product design.</li> <li>- The test chemical showed no adverse effects in an acute oral toxicity test up to 2000 mg/kg bw, as it is rare for a dermal test to generate a more severe classification. Under the same premise, a waiver may be considered if the oral LD<sub>50</sub> is &lt; 300 mg/kg bw.</li> <li>- The oral LD<sub>50</sub> is between 300-2000 mg/kg bw, and dermal penetration data of the test chemical indicates low dermal absorption (&lt;10%) when compared to oral absorption. The dermal-equivalent value of the oral LD<sub>50</sub> would be 3000 mg/kg bw (300 mg/kg bw [oral value] ÷ 0.1 [10% dermal absorption]).</li> </ul> |
| <i>Acute Inhalation Toxicity</i> | <ul style="list-style-type: none"> <li>- The test chemical is of low volatility, is not aerosolized, heated, evaporated, or otherwise made inhalable as a gas/vapor (under predicted use/storage/handling/transport conditions).</li> <li>- The test chemical is too large to be inhaled or does not readily crumble into inhalable particles.</li> <li>- An aerosol will be considered non-inhalable if &gt;99% of particles by mass are &gt;100 µm of diameter during human exposure.</li> <li>- Due to significant toxicokinetic reasons as to why inhalation of a chemical may lead to acute toxicity, a waiver may be considered for test chemicals that are classified as GHS Category 1 or 2 for acute or dermal toxicity. As there is no difference in labelling for these categories in terms of inhalation hazard, further animal testing to refine the classification is not needed.</li> </ul>                                                                                           |

**Table S4.** Skin irritation/corrosion testing waiver criteria [93].

| Toxicological Endpoint           | Waiver Criteria                                                                                                                                                                                                                                                                                                                                                                                                                                                                                                                                                                                                                                                                                                                                                                                                                                                                                                                                                                                                                                                                      |
|----------------------------------|--------------------------------------------------------------------------------------------------------------------------------------------------------------------------------------------------------------------------------------------------------------------------------------------------------------------------------------------------------------------------------------------------------------------------------------------------------------------------------------------------------------------------------------------------------------------------------------------------------------------------------------------------------------------------------------------------------------------------------------------------------------------------------------------------------------------------------------------------------------------------------------------------------------------------------------------------------------------------------------------------------------------------------------------------------------------------------------|
| <i>Skin Irritation/Corrosion</i> | <ul style="list-style-type: none"><li>- Results of in vitro test methods that are validated/met regulatory acceptance are sufficient to draw an appropriate conclusion.</li><li>- Test chemical is considered corrosive to skin through evaluation of existing <i>in vivo</i>, <i>in vitro</i>, or other data, or has a pH <math>\leq 2</math> or <math>\geq 11.5</math> (alongside high buffering capacity).</li><li>- Test chemical is spontaneously flammable in air or water at ambient temperature.</li><li>- Test chemical has been classified as an acute dermal hazard.</li><li>- Test chemical cannot feasibly be made into an accessible format for a skin corrosion/irritation test.</li><li>- For end-use products that contain strong dyes or pigments (which can interfere with data interpretation), an HPLC/UPLC-spectrophotometry procedure may be used instead of a standard absorbance (OD) measurement, to address colour interference. The colourant may also be removed from the product if there is evidence that the colourant is not an irritant.</li></ul> |

**Table S5.** Serious eye damage/irritation testing waiver criteria [93].

| Toxicological Endpoint               | Waiver Criteria                                                                                                                                                                                                                                                                                                                                                                                                                                                                                                                                                                                                                                                                                                                                                                                                                                                                                                       |
|--------------------------------------|-----------------------------------------------------------------------------------------------------------------------------------------------------------------------------------------------------------------------------------------------------------------------------------------------------------------------------------------------------------------------------------------------------------------------------------------------------------------------------------------------------------------------------------------------------------------------------------------------------------------------------------------------------------------------------------------------------------------------------------------------------------------------------------------------------------------------------------------------------------------------------------------------------------------------|
| <i>Serious eye damage/irritation</i> | <ul style="list-style-type: none"><li>- Results of in vitro test methods that are validated/met regulatory acceptance are sufficient to draw an appropriate conclusion.</li><li>- Test chemical is considered corrosive or irritant to skin through evaluation of existing <i>in vivo</i>, <i>in vitro</i>, or other data, or has a pH <math>\leq 2</math> or <math>\geq 11.5</math> (alongside high buffering capacity).</li><li>- Test chemical is spontaneously flammable in air or water at ambient temperature.</li><li>- Test chemical has been classified as an acute dermal hazard.</li><li>- Test chemical cannot feasibly be made into an accessible format for a serious eye damage/irritation test.</li><li>- Test chemical is composed of granules or pellets that are too large/non-friable (cannot be lodged in the eye), and the material retains its original form throughout application.</li></ul> |
